# Supplementary material for: Naringin Protects against Tau Hyperphosphorylation in Aβ25–35-Injured PC12 Cells through Modulation of ER, PI3K/AKT, and GSK-3β Signaling Pathways
Source: Hindawi journal article supplement (doi:10.1155/2023/1857330), 2023-02-15
Supplement: f1 [file 1857330.f1.pdf]

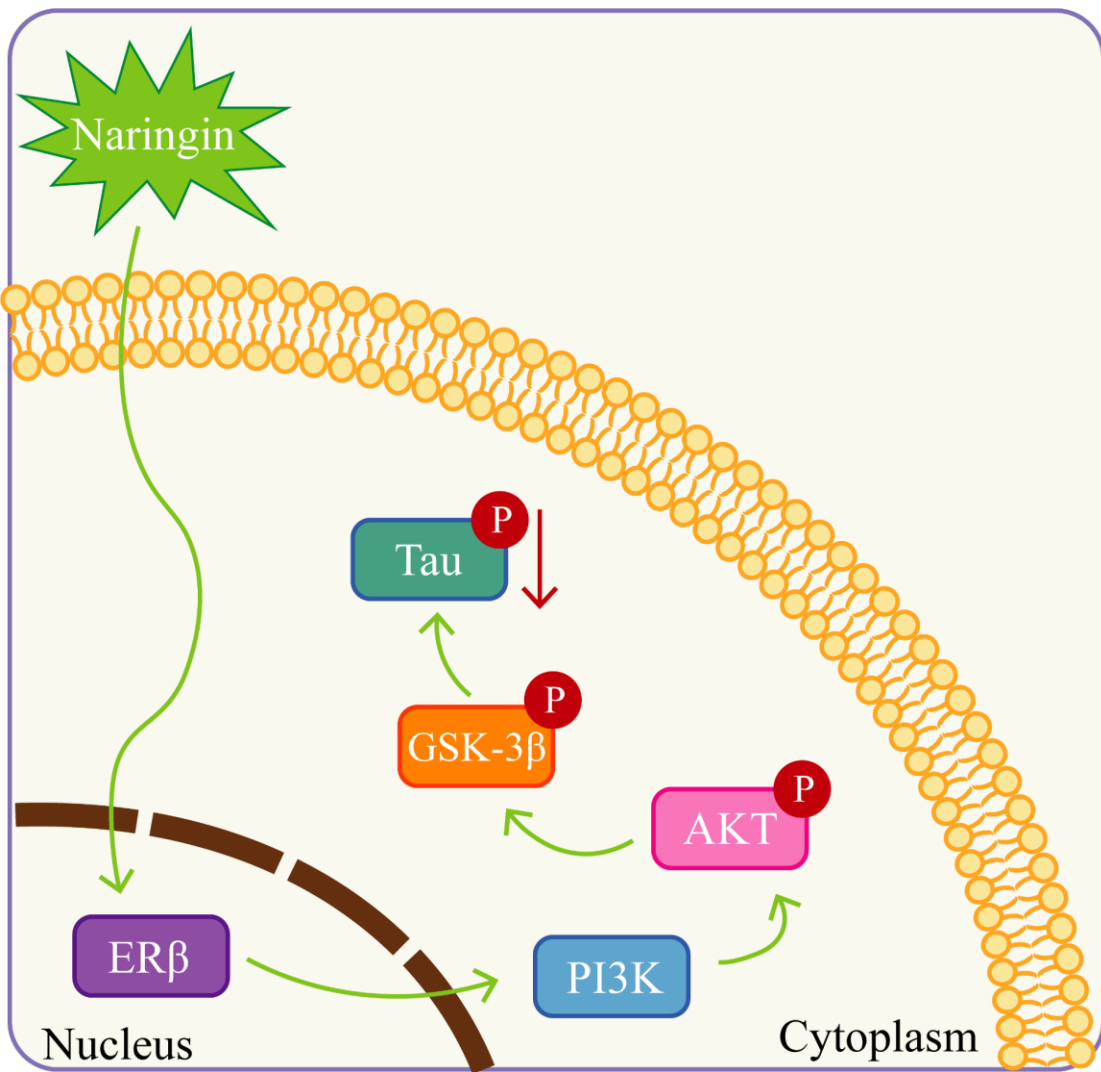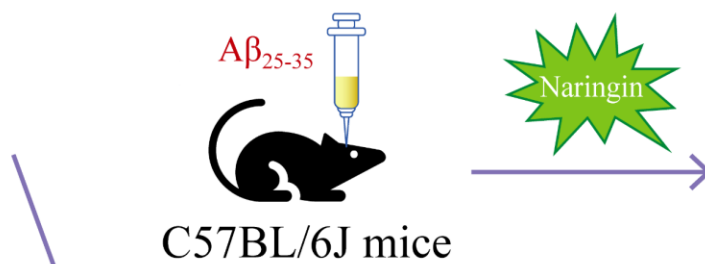

Learning and memory ability ↑  
Morphology of hippocampal neurons ↑

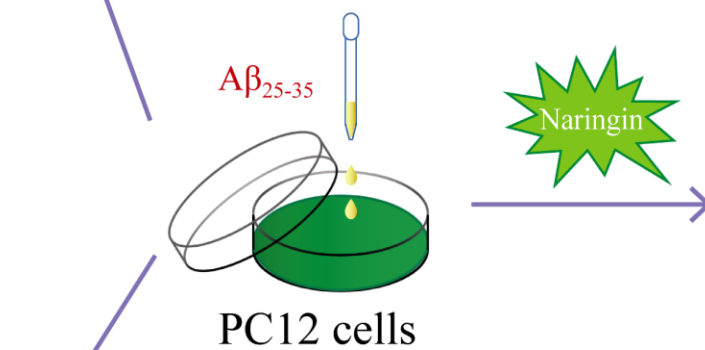

Viability ↑  
The rate of apoptosis ↓
